# Supplementary material for: What to Do When Everything Happens at Once: Analytic Approaches to Estimate the Health Effects of Co-Occurring Social Policies
Source: PubMed Central journal article supplement — Epidemiol Rev. 2021 Jul 2;43(1):33–47. doi: 10.1093/epirev/mxab005 (PMC8763089; doi:10.1093/epirev/mxab005), 2021-07-02

Web Appendix

**What to Do When Everything Happens at Once: Analytic Approaches to Estimate the Health Effects of Co-occurring Social Policies**

Ellicott C. Matthay, Laura M. Gottlieb, David Rehkopf, May Lynn Tan, David Vlahov, and M. Maria Glymour

**Table of Contents**

Web Table 1: Social policy studies identified in systematic sample ..... 2

Web Figure 1: Schema of alternative approaches to address policy co-occurrence by severity of policy co-occurrence and degree of departure from original causal question ..... 10

Web Table 1: Social policy studies identified in systematic sample

| Citation                                                                                                                                                                                                         | Policy                                      | Topic area                                            | Study design               | Methods used that address policy co-occurrence                                                                                                       |
|------------------------------------------------------------------------------------------------------------------------------------------------------------------------------------------------------------------|---------------------------------------------|-------------------------------------------------------|----------------------------|------------------------------------------------------------------------------------------------------------------------------------------------------|
| Liao Z, Zhou Y, Li H, et al. The Rates and Medical Necessity of Cesarean Delivery in the Era of the Two-Child Policy in Hubei and Gansu Provinces, China. <i>Am J Public Health</i> . 2019;109(3):476–482.       | Limiting fertility to 1 child or 2 children | Fertility                                             | Before-after               | None                                                                                                                                                 |
| Boertien D, Vignoli D. Legalizing Same-Sex Marriage Matters for the Subjective Well-being of Individuals in Same-Sex Unions. <i>Demography</i> . 2019;56(6):2109–2121.                                           | Legalization of same-sex marriage           | Lesbian, gay, bisexual, and transgender (LGBT) rights | Before-after               | None                                                                                                                                                 |
| Ahmed S, Fielding D. Changes in maternity leave coverage: Implications for fertility, labour force participation and child mortality. <i>Social Science &amp; Medicine</i> . 2019;241:112573.                    | Maternity leave coverage                    | Family leave                                          | Regression                 | Adjust for co-occurring policies; Select a less-correlated measure of policy exposure                                                                |
| Evans WN, Kroeger S, Palmer C, et al. Housing and Urban Development–Veterans Affairs Supportive Housing Vouchers and Veterans’ Homelessness, 2007–2017. <i>Am J Public Health</i> . 2019;109(10):1440–1445.      | Supportive housing vouchers                 | Housing                                               | Instrumental variables     | Select a less-correlated measure of policy exposure                                                                                                  |
| Högberg B, Strandh M, Petersen S, et al. Education system stratification and health complaints among school-aged children. <i>Social Science &amp; Medicine</i> . 2019;220:159–166.                              | Stratification of students by ability       | Education                                             | Regression                 | Adjust for co-occurring policies; Identify and evaluate the impacts of policy clusters                                                               |
| Bose B, Heymann J. Effects of tuition-free primary education on women’s access to family planning and on health decision-making: A cross-national study. <i>Social Science &amp; Medicine</i> . 2019;238:112478. | Tuition-free primary education              | Education                                             | Differences-in-differences | Adjust for co-occurring policies; Define the outcome on subpopulations likely to be affected by the index policy but not other co-occurring policies |
| Delaruelle K, van de Werfhorst H, Bracke P. Do comprehensive school reforms impact the health of early school leavers? Results of a comparative difference-in-                                                   | Comprehensive school reforms                | Education                                             | Differences-in-differences | Adjust for co-occurring policies                                                                                                                     |

|                                                                                                                                                                                                            |                                                    |                            |                            |                                                                                                                                                                                                                 |
|------------------------------------------------------------------------------------------------------------------------------------------------------------------------------------------------------------|----------------------------------------------------|----------------------------|----------------------------|-----------------------------------------------------------------------------------------------------------------------------------------------------------------------------------------------------------------|
| difference design. <i>Social Science &amp; Medicine</i> . 2019;239:112542.                                                                                                                                 |                                                    |                            |                            |                                                                                                                                                                                                                 |
| Rajmil L, Fernández de Sanmamed M-J. Austerity Policies and Mortality Rates in European Countries, 2011–2015. <i>Am J Public Health</i> . 2019;109(5):768–770.                                             | Austerity                                          | Macroeconomic policy       | Differences-in-differences | Identify and evaluate the impacts of policy clusters                                                                                                                                                            |
| Regidor E, Mateo A, Barrio G, et al. Mortality in Spain in the Context of the Economic Crisis and Austerity Policies. <i>Am J Public Health</i> . 2019;109(7):1043–1049.                                   | Austerity                                          | Macroeconomic policy       | Before-after               | None                                                                                                                                                                                                            |
| Patler C, Hamilton E, Meagher K, et al. Uncertainty About DACA May Undermine Its Positive Impact On Health For Recipients And Their Children. <i>Health Affairs</i> . 2019;38(5):738–745.                  | Deferred Action for Childhood Arrivals             | Immigration                | Differences-in-differences | Define the outcome on subpopulations likely to be affected by the index policy but not other co-occurring policies                                                                                              |
| Bruzelius E, Baum A. The Mental Health of Hispanic/Latino Americans Following National Immigration Policy Changes: United States, 2014–2018. <i>Am J Public Health</i> . 2019;109(12):1786–1788.           | Modified Immigration and Customs Enforcement (ICE) | Immigration                | Differences-in-differences | Identify and evaluate the impacts of policy clusters                                                                                                                                                            |
| Ku L, Brantley E, Pillai D. The Effects of SNAP Work Requirements in Reducing Participation and Benefits From 2013 to 2017. <i>Am J Public Health</i> . 2019;109(10):1446–1451.                            | Supplemental Nutritional Assistance Program        | Poverty and social welfare | Panel fixed effects        | Adjust for co-occurring policies                                                                                                                                                                                |
| Ettinger de Cuba S, Chilton M, Bovell-Ammon A, et al. Loss Of SNAP Is Associated With Food Insecurity And Poor Health In Working Families With Young Children. <i>Health Affairs</i> . 2019;38(5):765–773. | Supplemental Nutritional Assistance Program        | Poverty and social welfare | Regression                 | Adjust for co-occurring policies; Restrict the study sample to the region of common support; Define the outcome on subpopulations likely to be affected by the index policy but not other co-occurring policies |
| Heflin CM, Ingram SJ, Ziliak JP. The Effect Of The Supplemental Nutrition Assistance Program On Mortality. <i>Health Affairs</i> . 2019;38(11):1807–1815.                                                  | Supplemental Nutritional Assistance Program        | Poverty and social welfare | Instrumental variables     | Adjust for co-occurring policies; Identify and evaluate the impacts of policy clusters                                                                                                                          |
| Rummo PE, Noriega D, Parret A, et al. Evaluating A USDA Program That Gives SNAP Participants                                                                                                               | Supplemental Nutritional                           | Poverty and social welfare | Differences-in-differences | Define the outcome on subpopulations likely to be affected                                                                                                                                                      |

|                                                                                                                                                                                                                                                         |                                             |                            |                                     |                                                                                                                                                                         |
|---------------------------------------------------------------------------------------------------------------------------------------------------------------------------------------------------------------------------------------------------------|---------------------------------------------|----------------------------|-------------------------------------|-------------------------------------------------------------------------------------------------------------------------------------------------------------------------|
| Financial Incentives To Buy Fresh Produce In Supermarkets. Health Affairs. 2019;38(11):1816–1823.                                                                                                                                                       | Assistance Program                          |                            |                                     | by the index policy but not other co-occurring policies                                                                                                                 |
| Cuba SAE de, Bovell-Ammon AR, Cook JT, et al. SNAP, Young Children’s Health, and Family Food Security and Healthcare Access. American Journal of Preventive Medicine. 2019;57(4):525–532.                                                               | Supplemental Nutritional Assistance Program | Poverty and social welfare | Regression                          | Define the outcome on subpopulations likely to be affected by the index policy but not other co-occurring policies                                                      |
| Franckle RL, Thorndike AN, Moran AJ, et al. Supermarket Purchases Over the Supplemental Nutrition Assistance Program Benefit Month: A Comparison Between Participants and Nonparticipants. American Journal of Preventive Medicine. 2019;57(6):800–807. | Supplemental Nutritional Assistance Program | Poverty and social welfare | Differences-in-differences          | Define the outcome on subpopulations likely to be affected by the index policy but not other co-occurring policies                                                      |
| Heflin C, Arteaga I, Hodges L, et al. SNAP benefits and childhood asthma. Social Science & Medicine. 2019;220:203–211.                                                                                                                                  | Supplemental Nutritional Assistance Program | Poverty and social welfare | Regression                          | Define the outcome on subpopulations likely to be affected by the index policy but not other co-occurring policies; Select a less-correlated measure of policy exposure |
| Hamad R, Batra A, Karasek D, et al. The Impact of the Revised WIC Food Package on Maternal Nutrition During Pregnancy and Postpartum. Am J Epidemiol. 2019;188(8):1493–1502.                                                                            | Women, Infants, and Children                | Poverty and social welfare | Differences-in-differences          | None                                                                                                                                                                    |
| Hughes C. Reexamining the Influence of Conditional Cash Transfers on Migration From a Gendered Lens. Demography. 2019;56(5):1573–1605.                                                                                                                  | Conditional cash transfer                   | Poverty and social welfare | Regression                          | None                                                                                                                                                                    |
| Angeles G, de Hoop J, Handa S, et al. Government of Malawi’s unconditional cash transfer improves youth mental health. Social Science & Medicine. 2019;225:108–119.                                                                                     | Unconditional cash transfer                 | Poverty and social welfare | Cluster randomized controlled trial | None                                                                                                                                                                    |
| Litwin A, Perova E, Reynolds SA. A conditional cash transfer and Women’s empowerment: Does Bolsa Familia Influence intimate partner violence? Social Science & Medicine. 2019;238:112462.                                                               | Conditional cash transfer                   | Poverty and social welfare | Differences-in-differences          | Adjust for co-occurring policies; Select a less-correlated measure of policy exposure                                                                                   |

|                                                                                                                                                                                                                             |                                                              |                                                |                                     |                                                                                                                    |
|-----------------------------------------------------------------------------------------------------------------------------------------------------------------------------------------------------------------------------|--------------------------------------------------------------|------------------------------------------------|-------------------------------------|--------------------------------------------------------------------------------------------------------------------|
| Lebihan L, Mao Takongmo CO. Unconditional cash transfers and parental obesity. <i>Social Science &amp; Medicine</i> . 2019;224:116–126.                                                                                     | Unconditional cash transfer                                  | Poverty and social welfare                     | Differences-in-differences          | Define the outcome on subpopulations likely to be affected by the index policy but not other co-occurring policies |
| Shahidi FV, Muntaner C, Shankardass K, et al. The effect of unemployment benefits on health: A propensity score analysis. <i>Social Science &amp; Medicine</i> . 2019;226:198–206.                                          | Unemployment benefits                                        | Unemployment, sick leave, and pension benefits | Propensity score matching           | Define the outcome on subpopulations likely to be affected by the index policy but not other co-occurring policies |
| Chen X, Wang T, Busch SH. Does money relieve depression? Evidence from social pension expansions in China. <i>Social Science &amp; Medicine</i> . 2019;220:411–420.                                                         | Pension generosity                                           | Unemployment, sick leave, and pension benefits | Instrumental variables              | Adjust for co-occurring policies; Select a less-correlated measure of policy exposure                              |
| Park W, Baek J. The impact of employment protection on health: Evidence from fixed-term contract workers in South Korea. <i>Social Science &amp; Medicine</i> . 2019;233:158–170.                                           | Employment protections                                       | Unemployment, sick leave, and pension benefits | Differences-in-differences          | Define the outcome on subpopulations likely to be affected by the index policy but not other co-occurring policies |
| Stacey N, Mudara C, Ng SW, et al. Sugar-based beverage taxes and beverage prices: Evidence from South Africa's Health Promotion Levy. <i>Social Science &amp; Medicine</i> . 2019;238:112465.                               | Sugar-sweetened beverage tax                                 | Food and beverage                              | Before-after                        | Adjust for clustered policies                                                                                      |
| Massri C, Sutherland S, Källestål C, et al. Impact of the Food-Labeling and Advertising Law Banning Competitive Food and Beverages in Chilean Public Schools, 2014–2016. <i>Am J Public Health</i> . 2019;109(9):1249–1254. | Banning sales of competitive food and beverages in schools   | Food and beverage                              | Before-after                        | None                                                                                                               |
| Lin B-H, Guthrie JF, Smith TA. Dietary Guidance and New School Meal Standards: Schoolchildren's Whole Grain Consumption Over 1994–2014. <i>American Journal of Preventive Medicine</i> . 2019;57(1):57–67.                  | School meal standards                                        | Food and beverage                              | Before-after                        | Define the outcome on subpopulations likely to be affected by the index policy but not other co-occurring policies |
| Haghpanahan H, Lewsey J, Mackay DF, et al. An evaluation of the effects of lowering blood alcohol concentration limits for drivers on the rates of road traffic accidents and alcohol consumption: a natural                | Lowering legal blood alcohol concentration limit for drivers | Alcohol control                                | Comparative interrupted time series | None                                                                                                               |

|                                                                                                                                                                                                          |                                  |                            |                            |                                                                                       |
|----------------------------------------------------------------------------------------------------------------------------------------------------------------------------------------------------------|----------------------------------|----------------------------|----------------------------|---------------------------------------------------------------------------------------|
| experiment. <i>The Lancet</i> . 2019;393(10169):321–329.                                                                                                                                                 |                                  |                            |                            |                                                                                       |
| Hamad R, Modrek S, White JS. Paid Family Leave Effects on Breastfeeding: A Quasi-Experimental Study of US Policies. <i>Am J Public Health</i> . 2018;109(1):164–166.                                     | Paid family leave                | Family leave               | Differences-in-differences | None                                                                                  |
| Lin M, Wang Q. Center-based childcare expansion and grandparents' employment and well-being. <i>Social Science &amp; Medicine</i> . 2019;240:112547.                                                     | Expansion of childcare centers   | Dependent child benefits   | Differences-in-differences | Adjust for co-occurring policies; Select a less-correlated measure of policy exposure |
| Pilkauskas N, Micheltore K. The Effect of the Earned Income Tax Credit on Housing and Living Arrangements. <i>Demography</i> . 2019;56(4):1303–1326.                                                     | Earned Income Tax Credit         | Poverty and social welfare | Differences-in-differences | Adjust for co-occurring policies; Select a less-correlated measure of policy exposure |
| Gertner AK, Rotter JS, Shafer PR. Association Between State Minimum Wages and Suicide Rates in the U.S. <i>American Journal of Preventive Medicine</i> . 2019;56(5):648–654.                             | Minimum wage                     | Poverty and social welfare | Panel fixed effects        | Adjust for co-occurring policies                                                      |
| Ferdinand AO, Aftab A, Akinlotan MA. Texting-While-Driving Bans and Motor Vehicle Crash-Related Emergency Department Visits in 16 US States: 2007–2014. <i>Am J Public Health</i> . 2019;109(5):748–754. | Banning texting while driving    | Road traffic safety        | Differences-in-differences | Adjust for co-occurring policies                                                      |
| Torche F, Sirois C. Restrictive Immigration Law and Birth Outcomes of Immigrant Women. <i>American Journal of Epidemiology</i> . 2019;188(1):24–33.                                                      | Various anti-immigrant inclusion | Immigration                | Differences-in-differences | None                                                                                  |
| Myran DT, Chen JT, Bearnot B, et al. Alcohol Availability Across Neighborhoods in Ontario Following Alcohol Sales Deregulation, 2013–2017. <i>Am J Public Health</i> . 2019;109(6):899–905.              | Alcohol sales deregulation       | Alcohol control            | Before-after               | None                                                                                  |
| Tessler RA, Mooney SJ, Quistberg DA, et al. State-Level Beer Excise Tax and Firearm Homicide in Adolescents and Young Adults. <i>American Journal of Preventive Medicine</i> . 2019;56(5):708–715.       | Beer excise tax                  | Alcohol control            | Synthetic control          | None                                                                                  |

|                                                                                                                                                                                                                     |                                               |                 |                            |                                                                                        |
|---------------------------------------------------------------------------------------------------------------------------------------------------------------------------------------------------------------------|-----------------------------------------------|-----------------|----------------------------|----------------------------------------------------------------------------------------|
| Lira MC, Xuan Z, Coleman SM, et al. Alcohol Policies and Alcohol Involvement in Intimate Partner Homicide in the U.S. <i>American Journal of Preventive Medicine</i> . 2019;57(2):172–179.                          | Overall alcohol control policy stringency     | Alcohol control | Regression                 | Use an overall policy stringency or generosity score                                   |
| Everson EM, Dilley JA, Maher JE, et al. Post-Legalization Opening of Retail Cannabis Stores and Adult Cannabis Use in Washington State, 2009–2016. <i>Am J Public Health</i> . 2019;109(9):1294–1301.               | Legalization of cannabis for recreational use | Drug control    | Before-after               | None                                                                                   |
| Mooney AC, Neilands TB, Giannella E, et al. Effects of a voter initiative on disparities in punishment severity for drug offenses across California counties. <i>Social Science &amp; Medicine</i> . 2019;230:9–19. | Punishments for drug offenses                 | Drug control    | Before-after               | None                                                                                   |
| Doucette ML, Crifasi CK, Frattaroli S. Right-to-Carry Laws and Firearm Workplace Homicides: A Longitudinal Analysis (1992–2017). <i>Am J Public Health</i> . 2019;109(12):1747–1753.                                | Right-to-Carry firearm laws                   | Firearms        | Panel fixed effects        | Adjust for co-occurring policies                                                       |
| Klarevas L, Conner A, Hemenway D. The Effect of Large-Capacity Magazine Bans on High-Fatality Mass Shootings, 1990–2017. <i>Am J Public Health</i> . 2019;109(12):1754–1761.                                        | Large-capacity magazine bans                  | Firearms        | Panel fixed effects        | None                                                                                   |
| Sivaraman JJ, Ranapurwala SI, Moracco KE, et al. Association of State Firearm Legislation With Female Intimate Partner Homicide. <i>American Journal of Preventive Medicine</i> . 2019;56(1):125–133.               | Various firearms restrictions                 | Firearms        | Regression                 | Use an overall policy stringency or generosity score                                   |
| Ghiani M, Hawkins SS, Baum CF. Associations Between Gun Laws and Suicides. <i>Am J Epidemiol</i> . 2019;188(7):1254–1261.                                                                                           | Various firearm restrictions                  | Firearms        | Differences-in-differences | Adjust for co-occurring policies; Use an overall policy stringency or generosity score |
| Levy DT, Yuan Z, Li Y, et al. The Minnesota SimSmoke Tobacco Control Policy Model of Smokeless Tobacco and Cigarette Use. <i>American Journal of Preventive Medicine</i> . 2019;57(4):e103–e115.                    | Various tobacco control                       | Tobacco control | Simulation model           | None                                                                                   |
| Stallings-Smith S, Hamadi HY, Peterson BN, et al. Smoke-Free                                                                                                                                                        | Clean air restrictions                        | Tobacco control | Regression                 | None                                                                                   |

|                                                                                                                                                                                                                         |                                                 |                                                |                            |                                                                                                                                                                               |
|-------------------------------------------------------------------------------------------------------------------------------------------------------------------------------------------------------------------------|-------------------------------------------------|------------------------------------------------|----------------------------|-------------------------------------------------------------------------------------------------------------------------------------------------------------------------------|
| Policies and 30-Day Readmission Rates for Chronic Obstructive Pulmonary Disease. American Journal of Preventive Medicine. 2019;57(5):621–628.                                                                           |                                                 |                                                |                            |                                                                                                                                                                               |
| Hernandez EM, Vuolo M, Frizzell LC, et al. Moving Upstream: The Effect of Tobacco Clean Air Restrictions on Educational Inequalities in Smoking Among Young Adults. Demography. 2019;56(5):1693–1721.                   | Clean air restrictions                          | Tobacco control                                | Panel fixed effects        | Adjust for co-occurring policies                                                                                                                                              |
| Kingsley M, Setodji CM, Pane JD, et al. Short-Term Impact of a Flavored Tobacco Restriction: Changes in Youth Tobacco Use in a Massachusetts Community. American Journal of Preventive Medicine. 2019;57(6):741–748.    | Restrictions on flavored tobacco products       | Tobacco control                                | Differences-in-differences | Adjust for co-occurring policies                                                                                                                                              |
| Parmar D, Banerjee A. Impact of an employment guarantee scheme on utilisation of maternal healthcare services: Results from a natural experiment in India. Social Science & Medicine. 2019;222:285–293.                 | Guaranteed employment for rural workers         | Unemployment, sick leave, and pension benefits | Differences-in-differences | None                                                                                                                                                                          |
| Matthay EC, Farkas K, Rudolph KE, et al. Firearm and Nonfirearm Violence After Operation Peacemaker Fellowship in Richmond, California, 1996–2016. Am J Public Health. 2019;109(11):1605–1611.                          | Firearm violence prevention fellowship          | Firearms                                       | Synthetic control          | Restrict the study sample to the region of common support; Define the outcome on subpopulations likely to be affected by the index policy but not other co-occurring policies |
| Wright M, McKelvey W, Curtis CJ, et al. Impact of a Municipal Policy Restricting Trans Fatty Acid Use in New York City Restaurants on Serum Trans Fatty Acid Levels in Adults. Am J Public Health. 2019;109(4):634–636. | Restricting trans fatty acid use in restaurants | Food and beverage                              | Differences-in-differences | Define the outcome on subpopulations likely to be affected by the index policy but not other co-occurring policies                                                            |
| Lee MM, Falbe J, Schillinger D, et al. Sugar-Sweetened Beverage Consumption 3 Years After the Berkeley, California, Sugar-Sweetened Beverage Tax. Am J Public Health. 2019;109(4):637–639.                              | Sugar-sweetened beverage tax                    | Food and beverage                              | Differences-in-differences | None                                                                                                                                                                          |
| Roberto CA, Lawman HG, LeVasseur MT, et al. Association of a Beverage Tax on Sugar-                                                                                                                                     | Sugar-sweetened beverage tax                    | Food and beverage                              | Differences-in-differences | Define the outcome on subpopulations likely to be affected                                                                                                                    |



|                                                                                                                                                                                                          |                                                                    |                    |                                              |                                                                |
|----------------------------------------------------------------------------------------------------------------------------------------------------------------------------------------------------------|--------------------------------------------------------------------|--------------------|----------------------------------------------|----------------------------------------------------------------|
| <p>Sweetened and Artificially Sweetened Beverages With Changes in Beverage Prices and Sales at Chain Retailers in a Large Urban Setting. JAMA. 2019;321(18):1799–1810.</p>                               |                                                                    |                    |                                              | <p>by the index policy but not other co-occurring policies</p> |
| <p>Couttenier M, Petrencu V, Rohner D, et al. The Violent Legacy of Conflict: Evidence on Asylum Seekers, Crime, and Public Policy in Switzerland. American Economic Review. 2019;109(12):4378–4425.</p> | <p>Regulations on formal labor market involvement for refugees</p> | <p>Immigration</p> | <p>Regression, propensity score matching</p> | <p>None</p>                                                    |

Web Figure 1: Schema of alternative approaches to address policy co-occurrence by severity of policy co-occurrence and degree of departure from original causal question

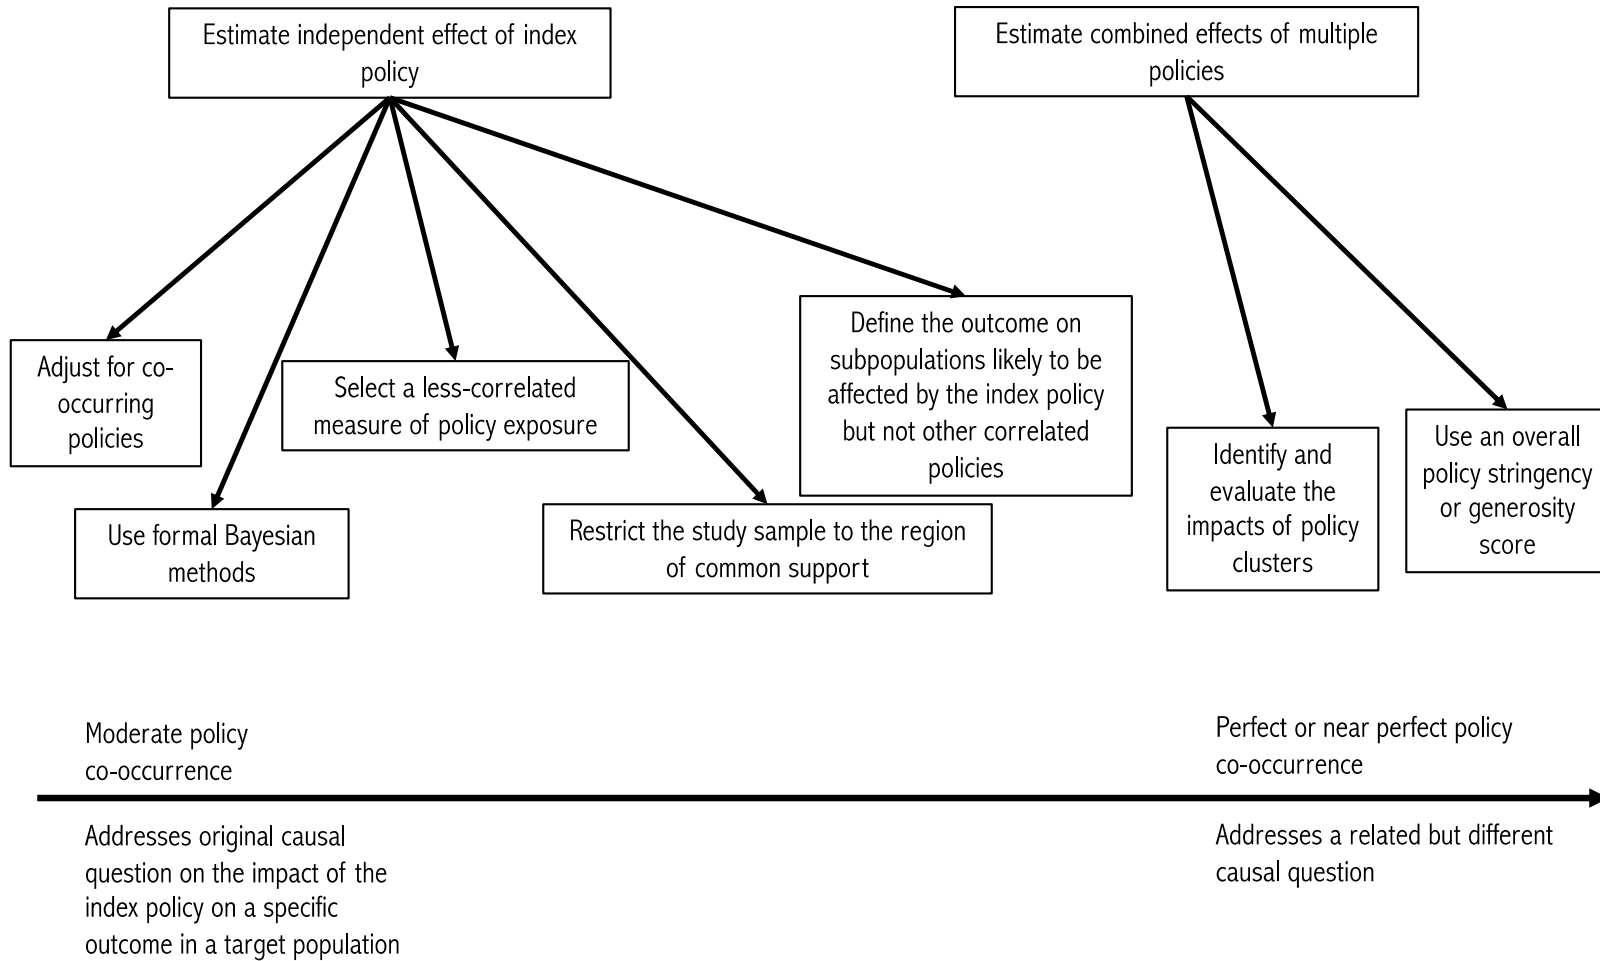

Supplement: web_material_mxab005.pdf [file web_material_mxab005.pdf]
